# Supplementary material
Source: publisher site journal article supplement (https://www.dovepress.com/article/545745)
Supplement: Supplementary file 1 [file 545745%20Supplementary%20Material.docx]

**Supplementary Material**

**
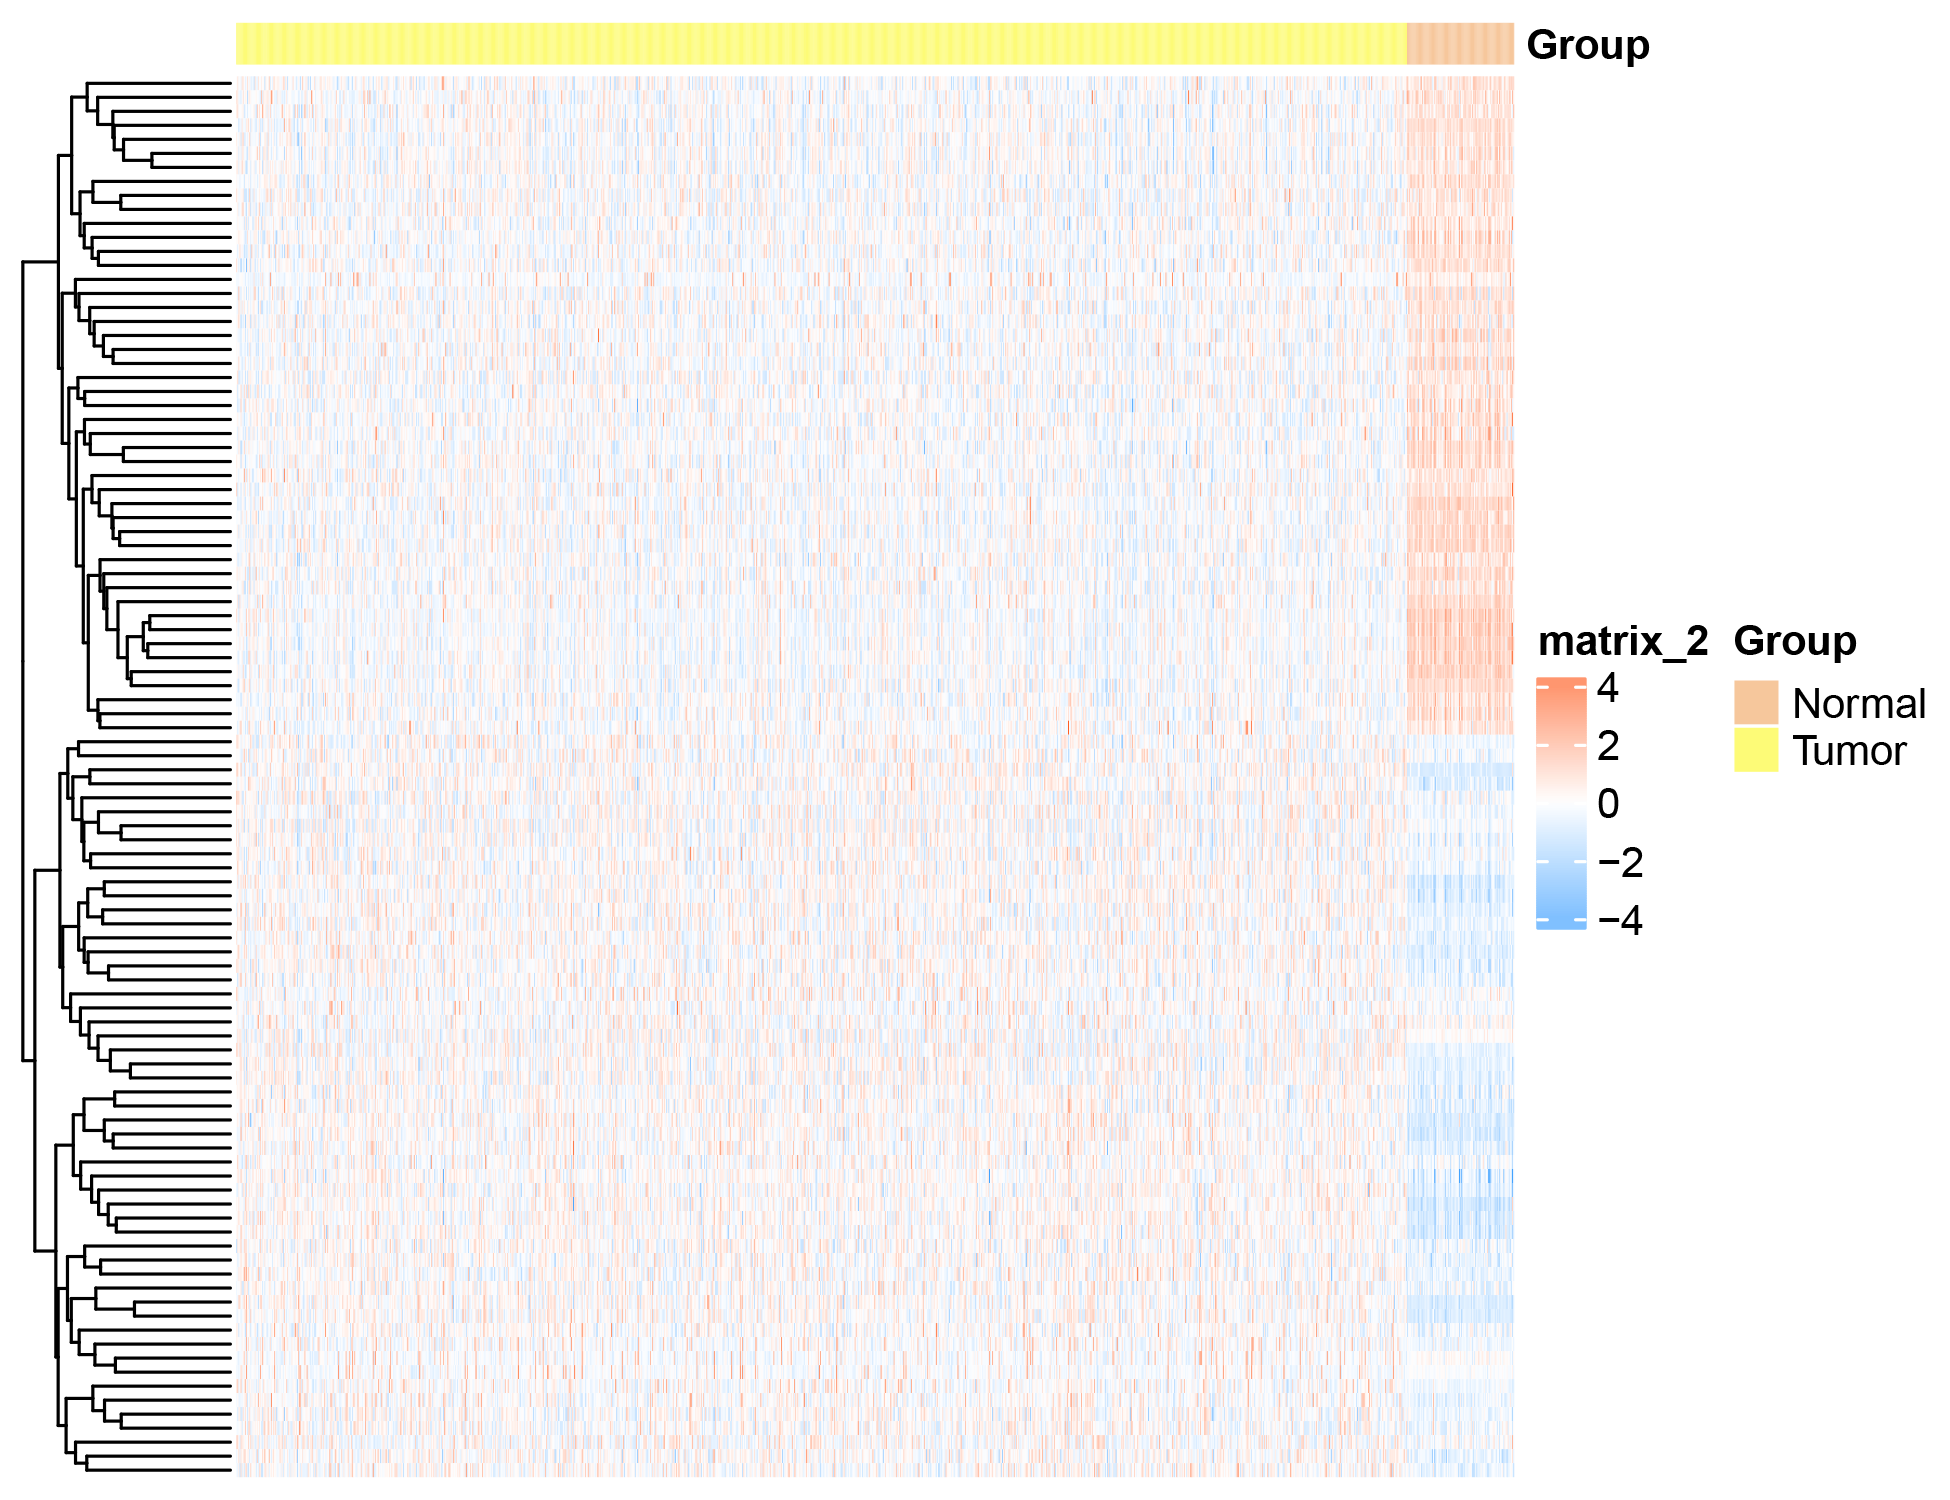
**

**Figure S1** Heatmap illustrating the expression patterns of DEGs between BC and normal tissues.

**
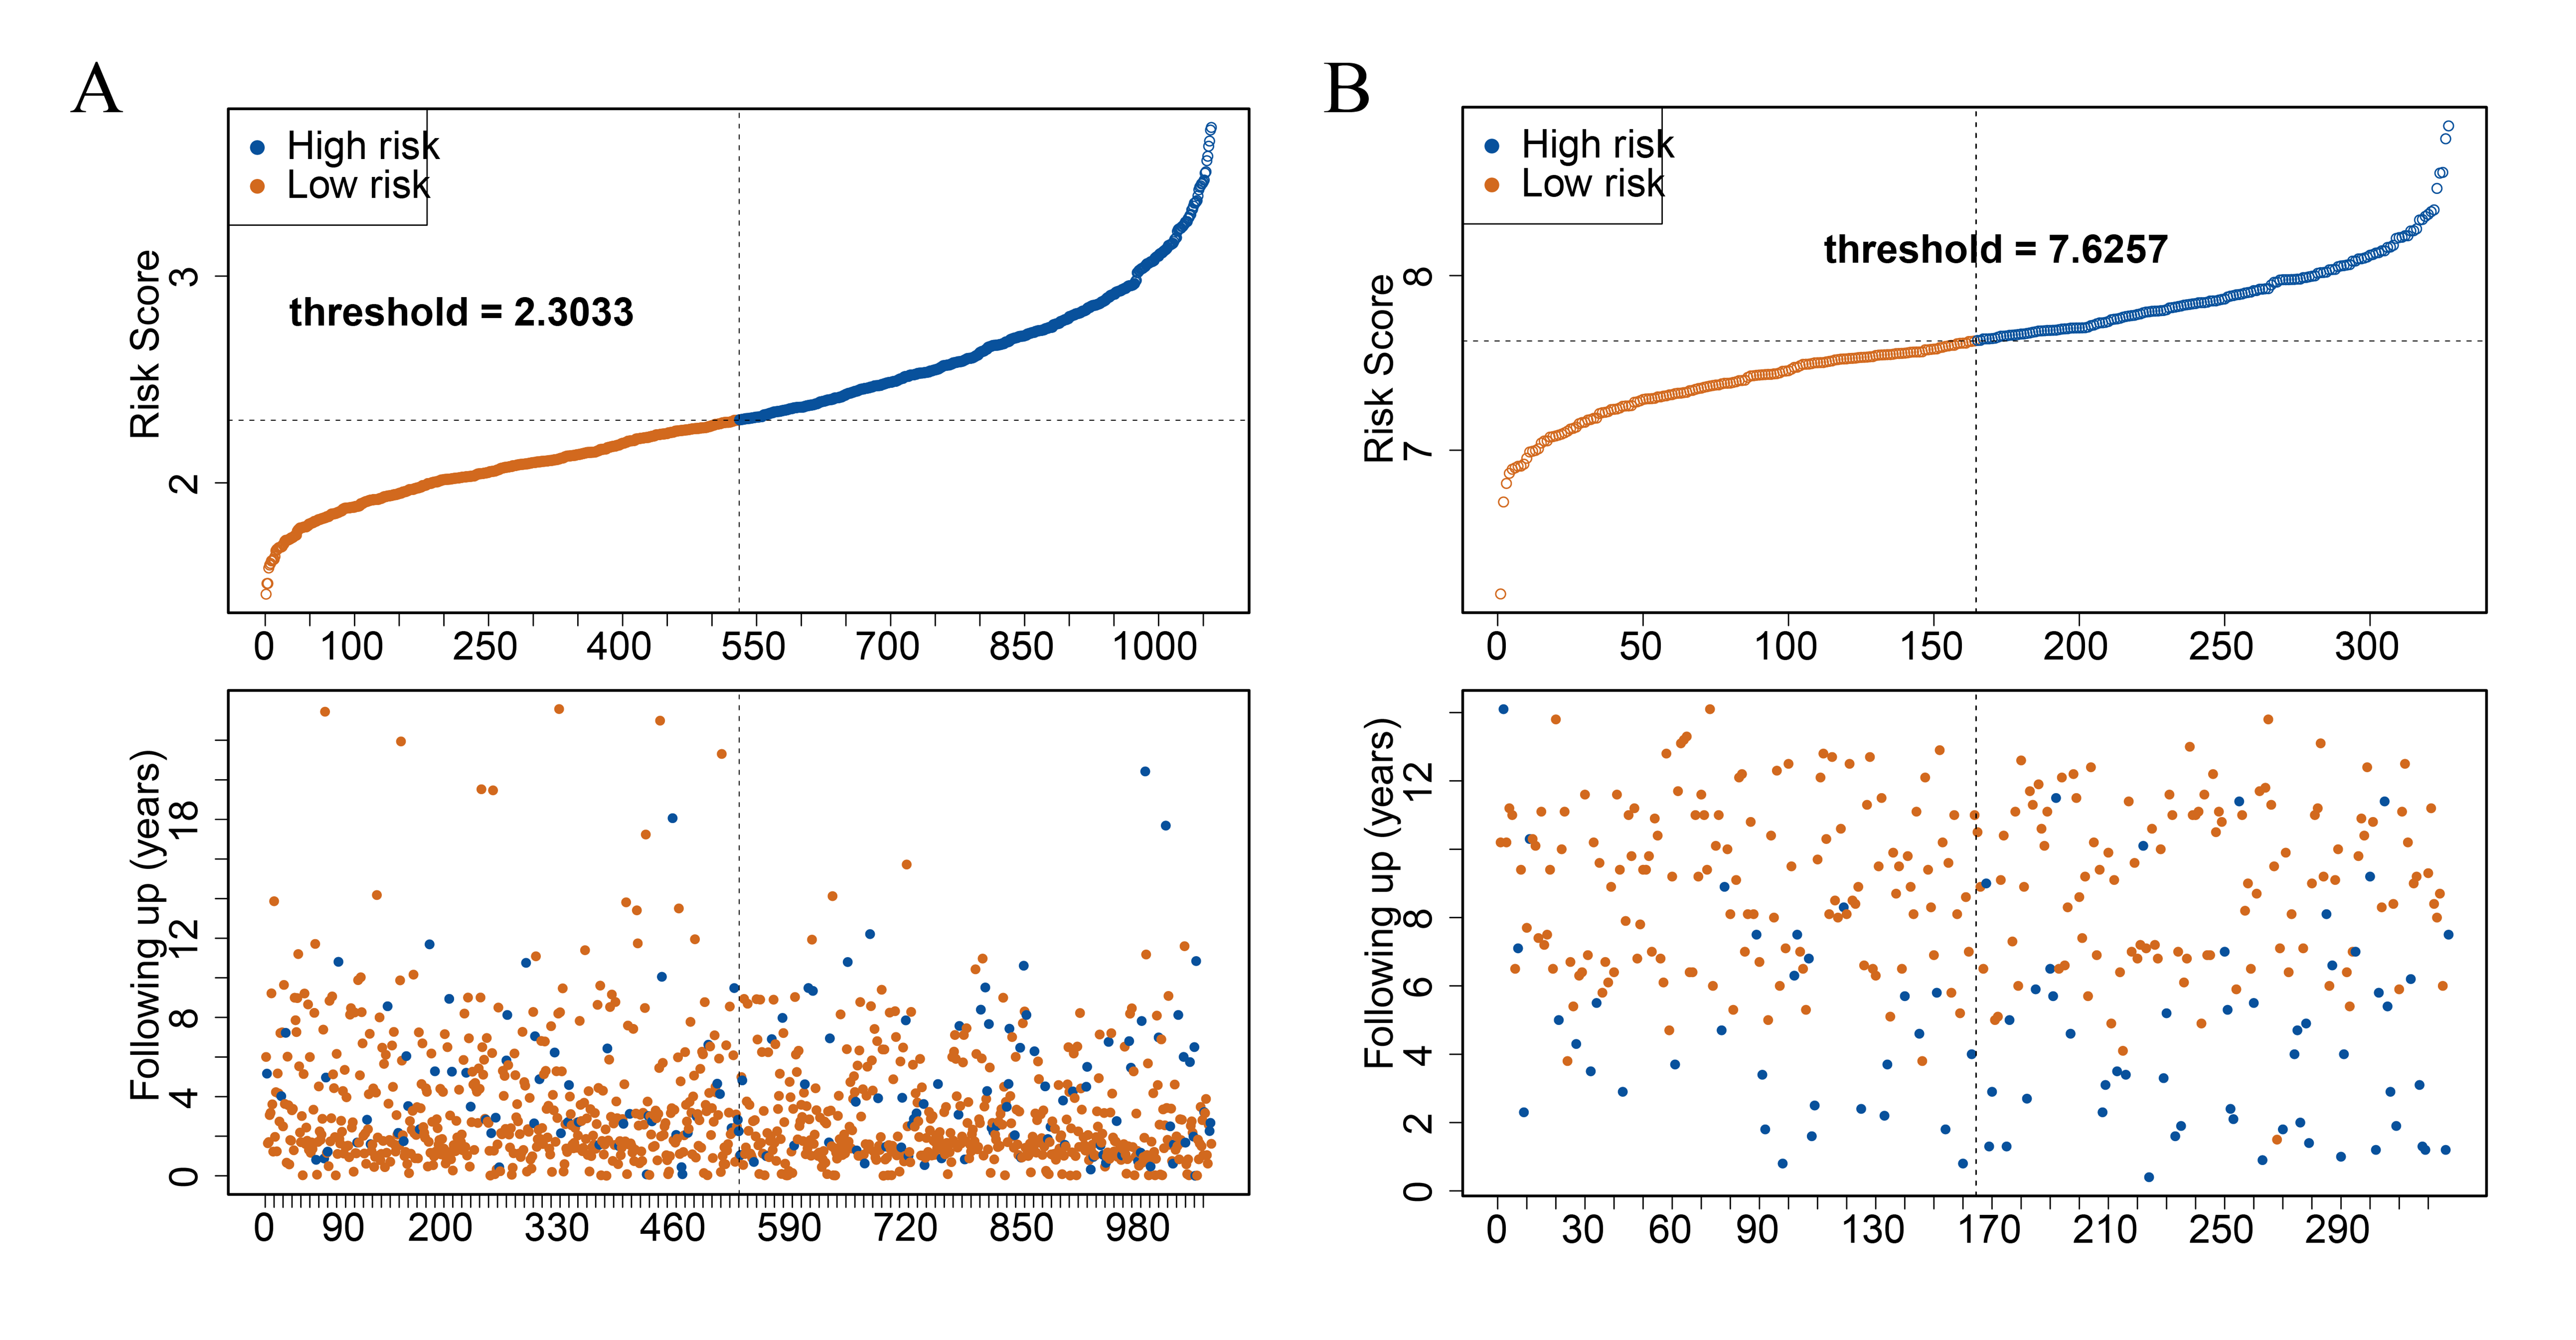
**

**Figure S2** Risk curves illustrating the distribution of risk scores and survival status among high-risk and low-risk groups within training (A) and validation (B) cohorts.

**
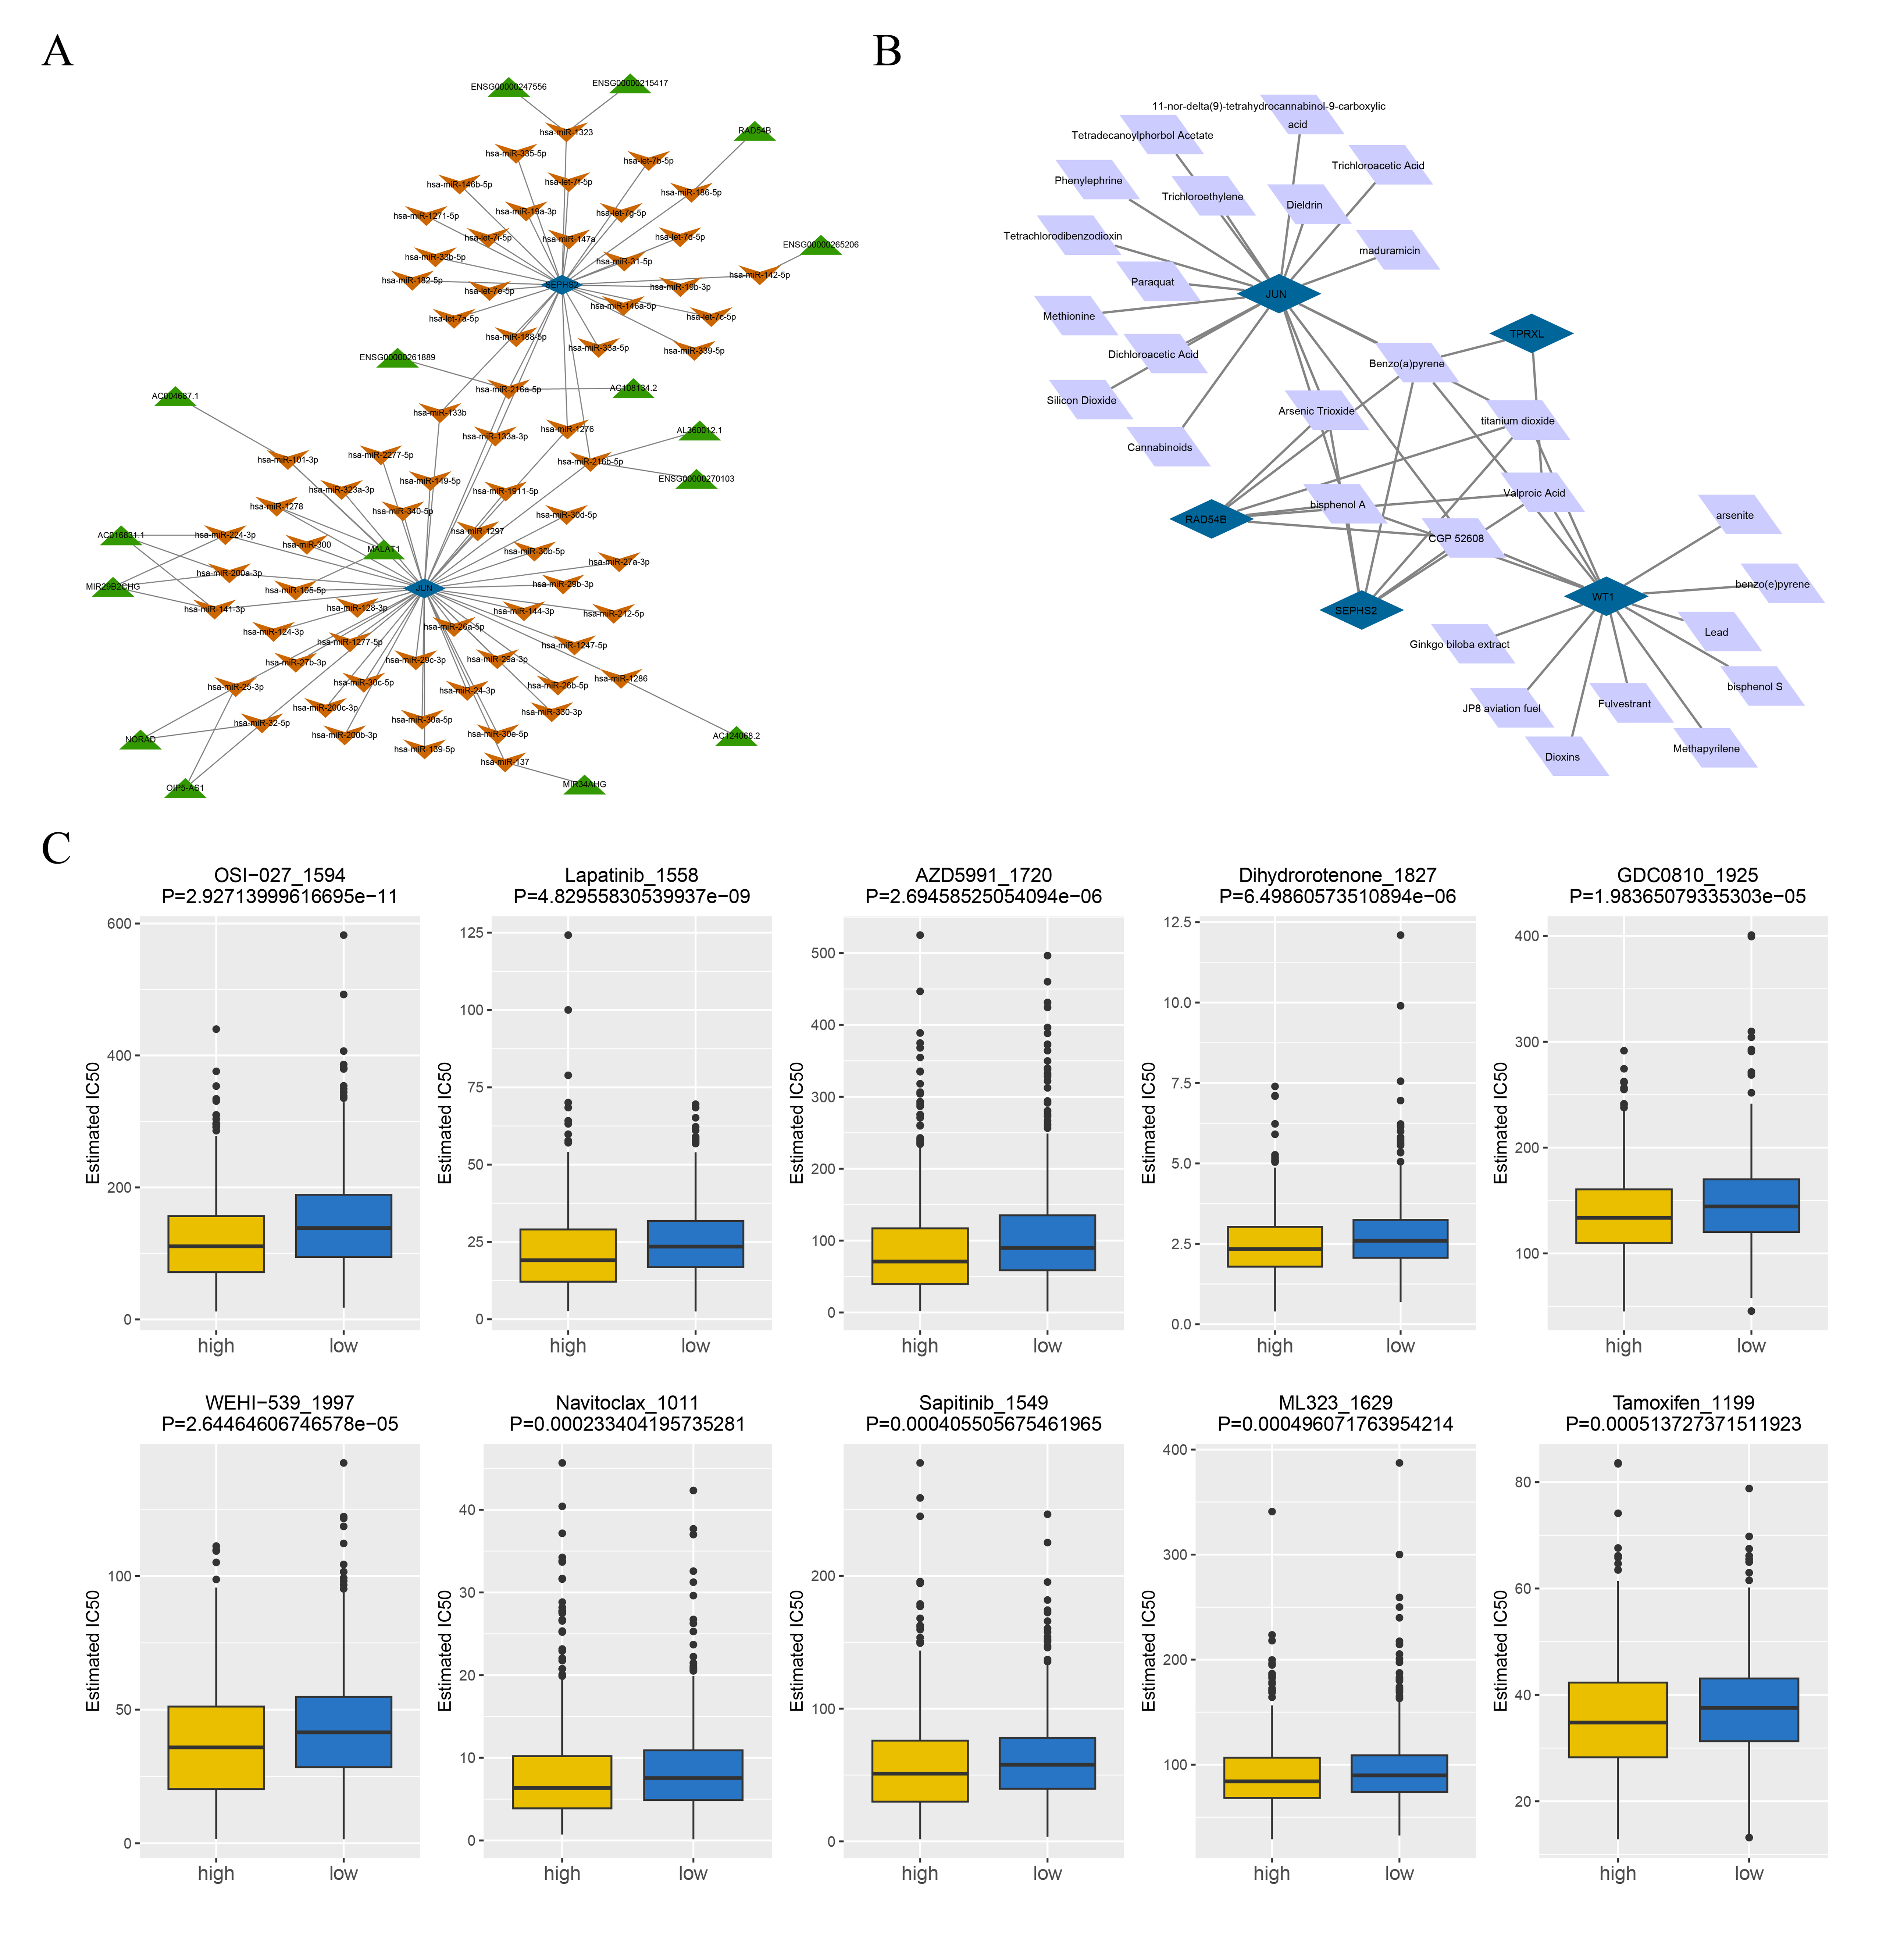
**

**Figure S3 Construction of regulatory network and analysis of differentially responsive drugs in HCC** (A) The mRNA-miRNA-lncRNA regulatory network for prognostic genes. (B) The regulatory network for prognostic genes and chemical compound. (C) Differences in drug sensitivity between high and low risk groups.

**
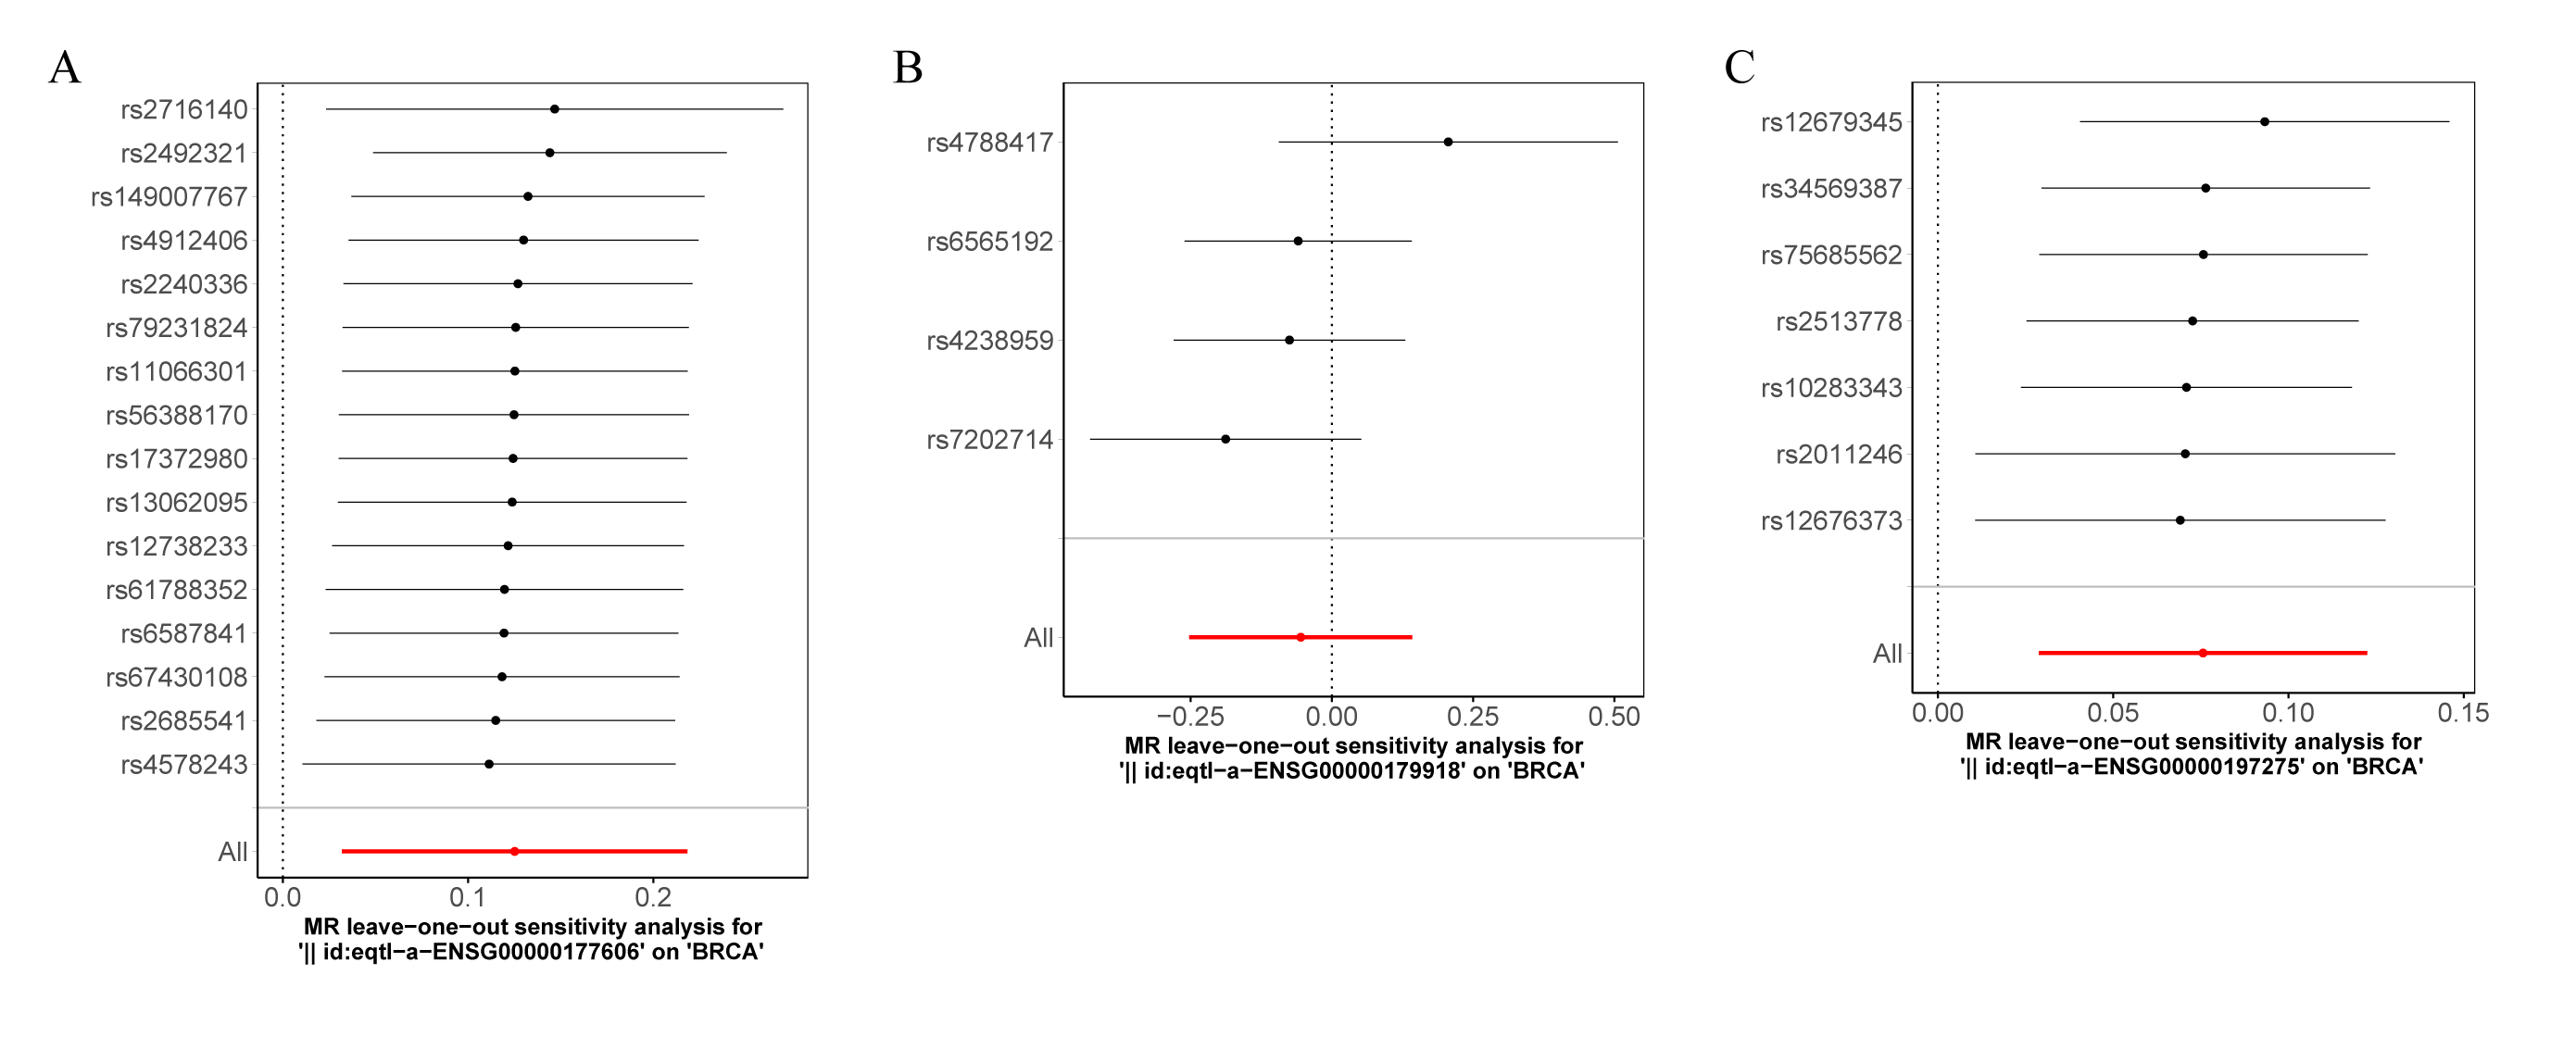
**

**Figure S4** The forest plot for Leave-one-out test.

**
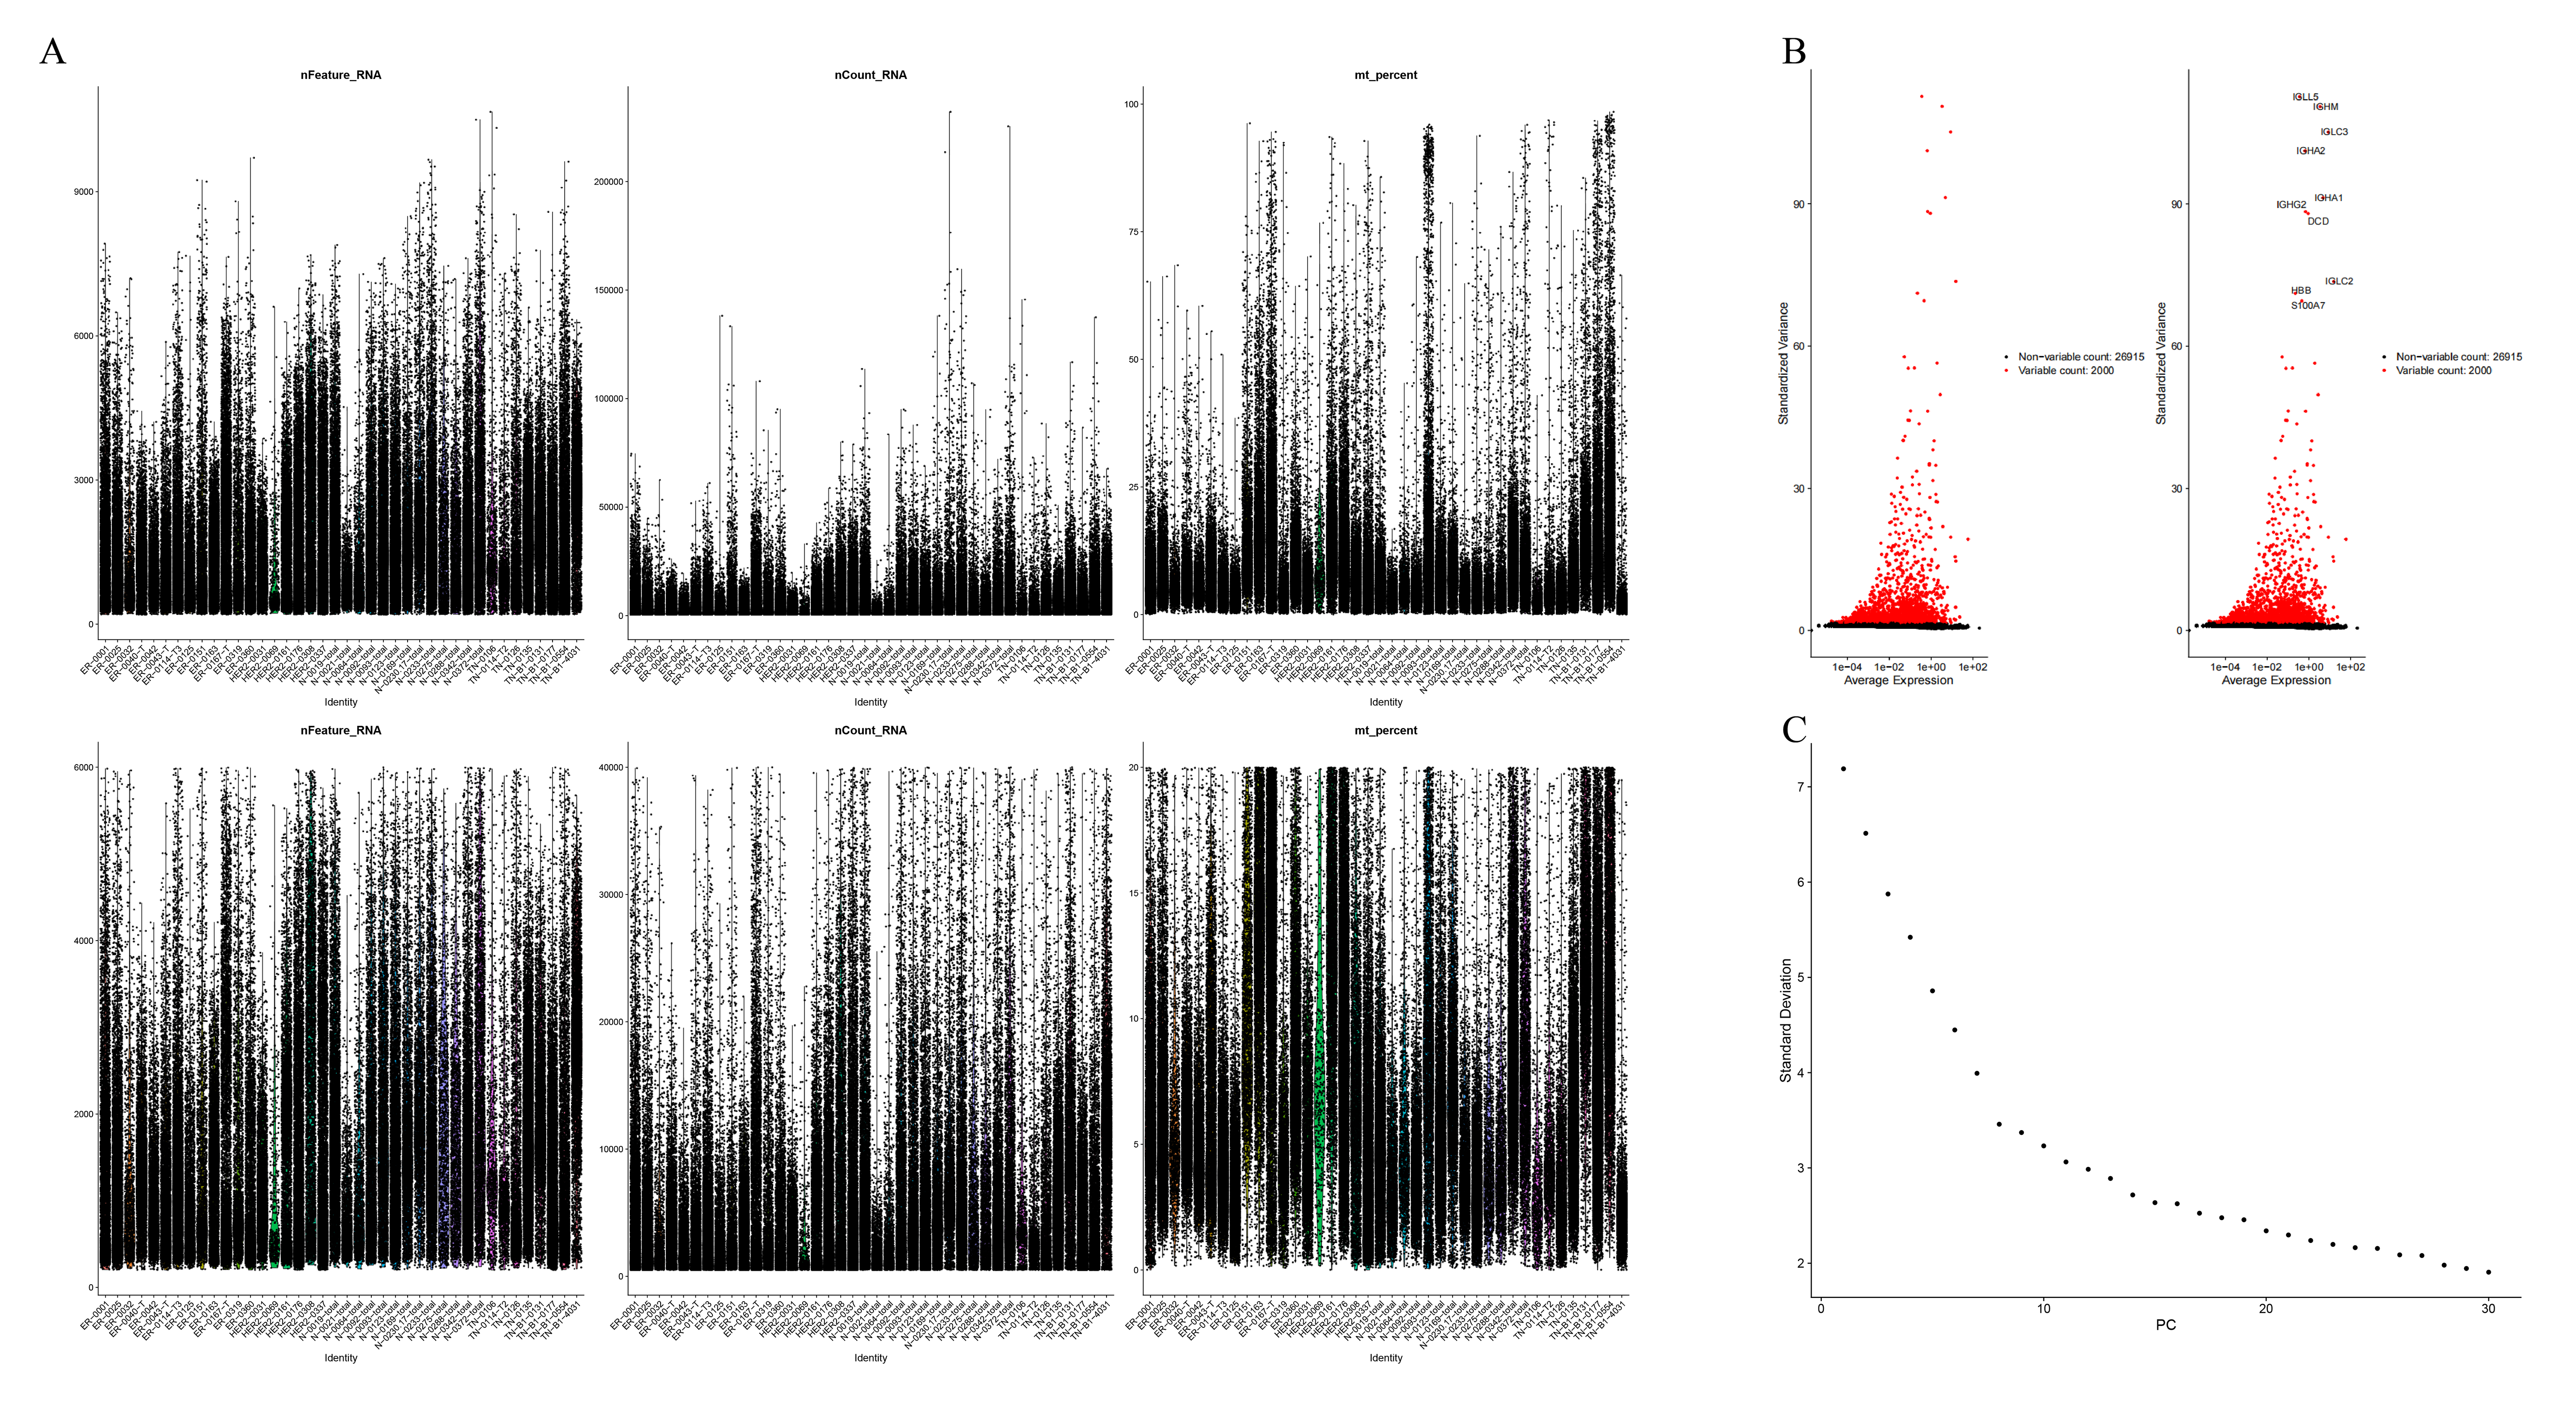
**

**Figure S5** (A) Before and after plots of single-cell analysis for quality control. (B) Screening for highly variable genes. (C) Principal component analysis (PCA) scree plot analysis.

**Table S1** The result of heterogeneity test

| outcome | exposure | method | Q | Q_df | Q_pval |
| --- | --- | --- | --- | --- | --- |
| BRCA | || id:eqtl-a-ENSG00000177606 | MR Egger | 8.1828 | 14.0000 | 0.8796 |
| BRCA | || id:eqtl-a-ENSG00000177606 | Inverse variance weighted | 8.4895 | 15.0000 | 0.9027 |
| BRCA | || id:eqtl-a-ENSG00000179918 | MR Egger | 2.7647 | 2.0000 | 0.2510 |
| BRCA | || id:eqtl-a-ENSG00000179918 | Inverse variance weighted | 5.1899 | 3.0000 | 0.1584 |
| BRCA | || id:eqtl-a-ENSG00000197275 | MR Egger | 6.8701 | 5.0000 | 0.2305 |
| BRCA | || id:eqtl-a-ENSG00000197275 | Inverse variance weighted | 7.5463 | 6.0000 | 0.2733 |

Q, Cochran's Q test estimate; Q_df, Q_degree of freedom.

**Table S2** The result of horizontal pleiotropy test

| outcome | exposure | egger_intercept | se | pval |
| --- | --- | --- | --- | --- |
| BRCA | || id:eqtl-a-ENSG00000177606 | 0.0067 | 0.0120 | 0.5884 |
| BRCA | || id:eqtl-a-ENSG00000179918 | 0.0386 | 0.0292 | 0.3164 |
| BRCA | || id:eqtl-a-ENSG00000197275 | 0.0172 | 0.0246 | 0.5143 |

se, standard error
